# Supplementary material for: In situ formed lithium ionic conductor thin film on the surface of high-crystal-layered LiCoO2 as a high-voltage cathode material
Source: Royal Society of Chemistry journal article supplement (doi:10.1039/d1qm00627d), 2021-01-01
Supplement: d1qm00627d1.pdf [file d1qm00627d1.pdf]

## Supporting Information

### In-Situ Formed Lithium Ionic Conductor Thin Film on the Surface of High-Crystal-Layered $\text{LiCoO}_2$ as High-Voltage Cathode Materials

Liewu Li,<sup>‡</sup> Qi Yuan,<sup>‡a</sup> Shenghua Ye, Yonghuan Fu, Xiangzhong Ren, Qianling Zhang\* and

Jianhong Liu

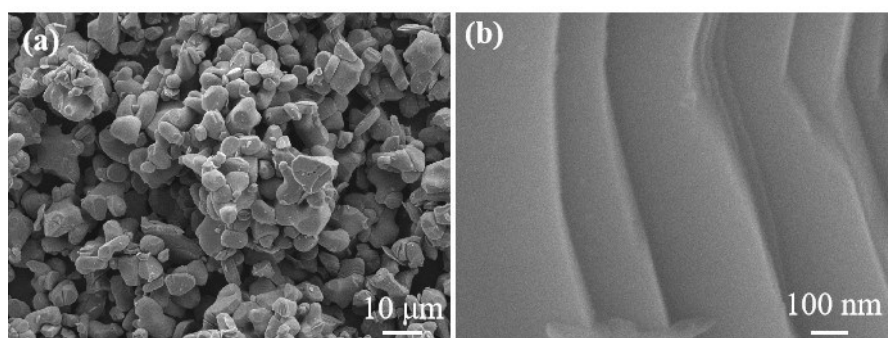

**Fig. S1** (a) SEM image of the  $\text{LiCoO}_2$ . (b) High-magnification SEM image of the  $\text{LiCoO}_2$ .

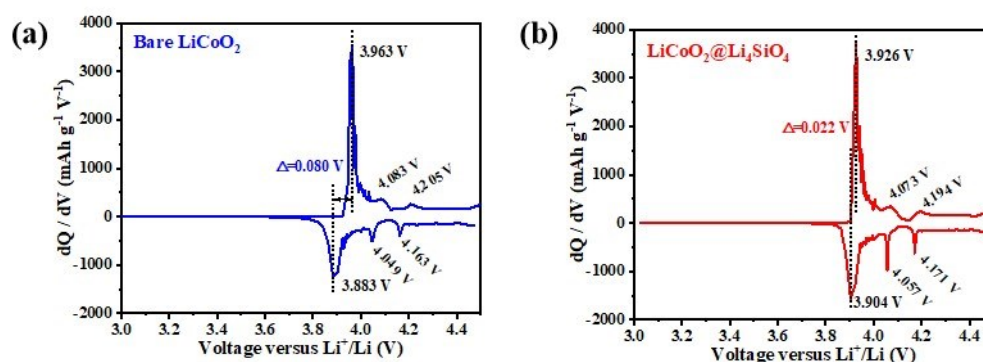

**Fig. S2**  $dQ/dV$  profiles of the first cycle for the bare  $\text{LiCoO}_2$  (a) and  $\text{LiCoO}_2@Li_4SiO_4$  (b) electrodes.

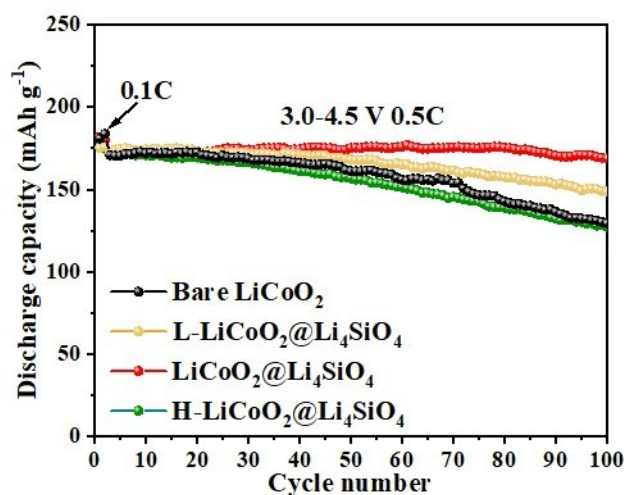

**Fig. S3** Cycling performance of the bare  $\text{LiCoO}_2$ ,  $\text{L-LiCoO}_2@Li_4SiO_4$ ,  $\text{LiCoO}_2@Li_4SiO_4$ , and  $\text{H-LiCoO}_2@Li_4SiO_4$  electrodes at 0.5 C.

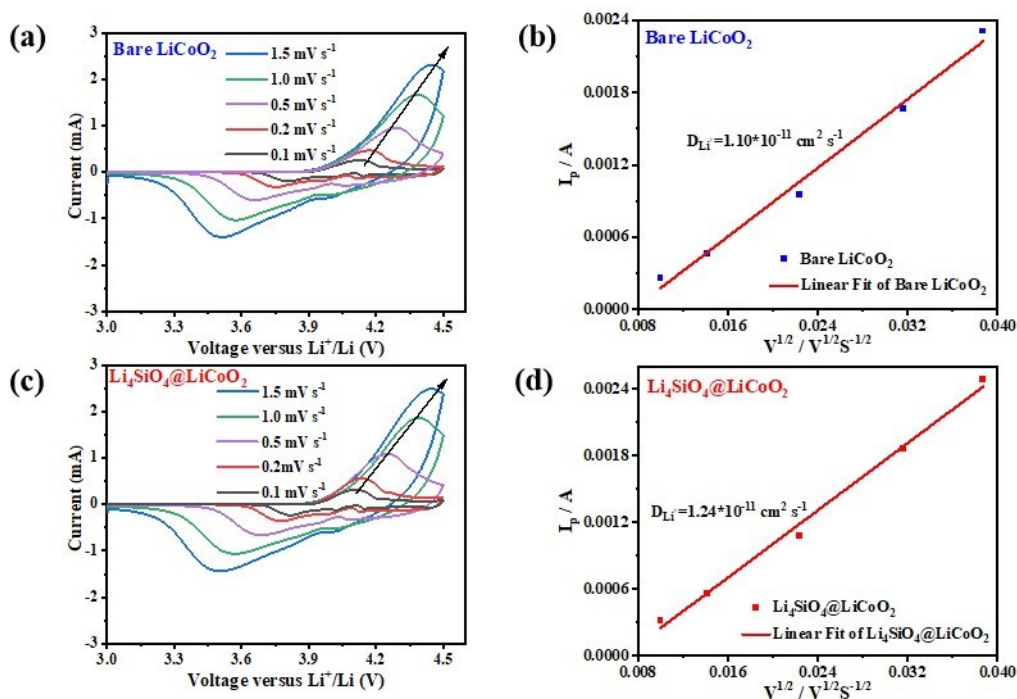

**Fig. S4** Kinetic analysis of the electrochemical behavior of the bare  $\text{LiCoO}_2$  and  $\text{LiCoO}_2@Li_4SiO_4$  electrodes. CV curves at various scan rates ranging from 0.1–1.5  $\text{mV s}^{-1}$  (a) and the relationship between  $I_p$  and  $v^{1/2}$  (b) for the bare  $\text{LiCoO}_2$  electrode. CV curves at various scan rates ranging from 0.1–1.5  $\text{mV s}^{-1}$  (c) and the relationship between  $I_p$  and  $v^{1/2}$  (d) for the  $\text{LiCoO}_2@Li_4SiO_4$  electrode.

**Table S1.** Comparison of the electrochemical properties of the  $\text{LiCoO}_2@Li_4SiO_4$  cathode with previously reported  $\text{LiCoO}_2$ -based cathodes for LIBs.

| $\text{LiCoO}_2$ -based | Cut-off | Current | Initial | Cycle | Capacity | Refs |
|-------------------------|---------|---------|---------|-------|----------|------|
|-------------------------|---------|---------|---------|-------|----------|------|

| cathode                                                                                                            | potentials<br>(V vs.<br>Li/Li <sup>+</sup> ) | density<br>(1C = 274<br>mA g <sup>-1</sup> ) | discharge<br>capacity<br>(mAh g <sup>-1</sup> ) | number | retention |              |
|--------------------------------------------------------------------------------------------------------------------|----------------------------------------------|----------------------------------------------|-------------------------------------------------|--------|-----------|--------------|
| TiO <sub>2</sub> coated LiCoO <sub>2</sub>                                                                         | 3–4.5                                        | 1C                                           | 186                                             | 100    | 86.5%     | [1]          |
| MgAl <sub>2</sub> O <sub>4</sub> -<br>modified LiCoO <sub>2</sub>                                                  | 3–4.5                                        | 0.58C                                        | 184                                             | 70     | 96.8%     | [2]          |
| Li-Al-F modified<br>LiCoO <sub>2</sub>                                                                             | 3–4.6                                        | 0.1C                                         | 208.6                                           | 100    | 89.1%     | [3]          |
| Li <sub>2</sub> ZrO <sub>3</sub> coated<br>LiCoO <sub>2</sub>                                                      | 3–4.5                                        | 3.65C                                        | 126.7                                           | 100    | 85.2%     | [4]          |
| Al-doped ZnO<br>coated LiCoO <sub>2</sub>                                                                          | 2.75–4.5                                     | 0.36C                                        | 185                                             | 200    | 95%       | [5]          |
| Li <sub>3</sub> PO <sub>4</sub> coated<br>LiCoO <sub>2</sub>                                                       | 3–4.5                                        | 1C                                           | 185                                             | 100    | 80%       | [6]          |
| Al-doped ZnO<br>coated LiCoO <sub>2</sub>                                                                          | 3–4.5                                        | 0.14C                                        | 174.7                                           | 100    | 97.4%     | [7]          |
| Li <sub>1.5</sub> Al <sub>0.5</sub> Ti <sub>1.5</sub> (PO <sub>4</sub> ) <sub>3</sub><br>Coated LiCoO <sub>2</sub> | 3–4.6                                        | 0.5C                                         | 214.6                                           | 100    | 88.3%     | [8]          |
| Li <sub>4</sub> Ti <sub>5</sub> O <sub>12</sub> coated<br>LiCoO <sub>2</sub>                                       | 3–4.5                                        | 0.2C                                         | 190                                             | 60     | 90%       | [9]          |
| LiCo <sub>x</sub> Mn <sub>2-x</sub> O <sub>4</sub><br>coated LiCoO <sub>2</sub>                                    | 3–4.5                                        | 0.73C                                        | 174                                             | 300    | 82%       | [10]         |
| LiCoO <sub>2</sub> @Li <sub>4</sub> SiO <sub>4</sub>                                                               | 3–4.5                                        | 0.5C                                         | 180.7(at<br>0.1C)                               | 100    | 98.9%     | This<br>work |
|                                                                                                                    |                                              | 2 C                                          | 180.7(at<br>0.1C)                               | 500    | 82.2%     | This<br>work |

## References

- [1] A. Zhou, Y. Lu, Q. Wang, J. Xu, W. Wang, X. Dai and J. Li, Sputtering TiO<sub>2</sub> on LiCoO<sub>2</sub> composite electrodes as a simple and effective coating to enhance high-voltage cathode performance, *J. Power Sources*, 2017, **346**, 24-30.
- [2] D. Liang, H. Xiang, X. Liang, S. Cheng and C. Chen, Spinel MgAl<sub>2</sub>O<sub>4</sub> modification on LiCoO<sub>2</sub> cathode materials with the combined advantages of MgO and Al<sub>2</sub>O<sub>3</sub> modifications for high-voltage lithiumion batteries, *RSC Adv.*, 2017, **7**, 6809-6817.
- [3] J. Qian, L. Liu, J. Yang, S. Li, X. Wang, H. Zhuang and Y. Lu, Electrochemical surface passivation of LiCoO<sub>2</sub> particles at ultrahigh voltage and its applications in lithium-based batteries, *Nat. Commun.*, 2018, **9**, 4918.
- [4] J. Zhang, R. Gao, L. Sun, H. Zhang, Z. Hu and X. Liu, Unraveling the multiple effects of Li<sub>2</sub>ZrO<sub>3</sub> coating on the structural and electrochemical performances of LiCoO<sub>2</sub> as high-voltage cathode Materials, *Electrochim. Acta*, 2016, **209**, 102-110.
- [5] B. Shen, P. Zuo, Q. Li, X. He, G. Yin, Y. Ma, X. Cheng, C. Du and Y. Gao, Lithium Cobalt Oxides Functionalized by Conductive Al-doped ZnO Coating as Cathode for High-performance Lithium Ion Batteries, *Electrochim. Acta*, 2017, **224**, 96-104.

- [6] A. Zhou, J. Xu, X. Dai, B. Yang, Y. Lu, L. Wang, C. Fan and J. Li, Improved high-voltage and high-temperature electrochemical performances of LiCoO<sub>2</sub> cathode by electrode sputter-coating with Li<sub>3</sub>PO<sub>4</sub>, *J. Power Sources*, 2016, **322**, 10-16.
- [7] K. Nie, X. Sun, J. Wang, Y. Wang, W. Qi, D. Xiao, J. Zhang, R. Xiao, X. Yu, H. Li, X. Huang and L. Chen, Realizing long-term cycling stability and superior rate performance of 4.5 V-LiCoO<sub>2</sub> by aluminum doped zinc oxide coating achieved by a simple wet-mixing method, *J. Power Sources*, 2020, **470**, 228423.
- [8] Y. Wang, Q. Zhang, Z. Xue, L. Yang, J. Wang, F. Meng, Q. Li, H. Pan, J. Zhang, Z. Jiang, W. Yang, X. Yu, L. Gu and H. Li, An In Situ Formed Surface Coating Layer Enabling LiCoO<sub>2</sub> with Stable 4.6 V High-Voltage Cycle Performances, *Adv. Energy Mater.*, 2020, **10**, 2001413.
- [9] A. Zhou, X. Dai, Y. Lu, Q. Wang, M. Fu and J. Li, Enhanced Interfacial Kinetics and High-Voltage/High-Rate Performance of LiCoO<sub>2</sub> Cathode by Controlled Sputter-Coating with a Nanoscale Li<sub>4</sub>Ti<sub>5</sub>O<sub>12</sub> Ionic Conductor, *ACS Appl. Mater. Interfaces*, 2016, **8**, 34123-34131.
- [10] R. Gu, Z. Ma, T. Cheng, Y. Lyu, A. Nie and B. Gao, Improved Electrochemical Performances of LiCoO<sub>2</sub> at Elevated Voltage and Temperature with an In Situ Formed Spinel Coating Layer, *ACS Appl. Mater. Interfaces*, 2018, **10**, 31271-31279.
